# Supplementary material for: ‘Clickable’ hydrogels for all: facile fabrication and functionalization
Source: Royal Society of Chemistry journal article supplement (doi:10.1039/c3bm60171d), 2013-08-23
Supplement: c3bm60171d.pdf [file c3bm60171d.pdf]

## Electronic Supplementary Information

### ‘Clickable’ hydrogels for all: facile fabrication and functionalization

Luca Beria,<sup>a,b</sup> Tugce Nihal Gevrek,<sup>b</sup> Asli Erdog,<sup>b</sup> Rana Sanyal,<sup>b</sup> Dario Pasini<sup>\*a</sup>  
and Amitav Sanyal<sup>\*b</sup>

<sup>a</sup> *Department of Chemistry, University of Pavia, 27100, Pavia, Italy*

<sup>b</sup> *Department of Chemistry Bogazici University, Bebek, 34342, Istanbul, Turkey*

#### Contents:

Figure S1. FT-IR spectra of hydrogels H1, H2 and H3.

Figure S2. FT-IR spectra of hydrogels H4, H5 and H6.

Figure S3. Theoretical and experimental N atom percentage of Cysteamine.HCl attached hydrogels

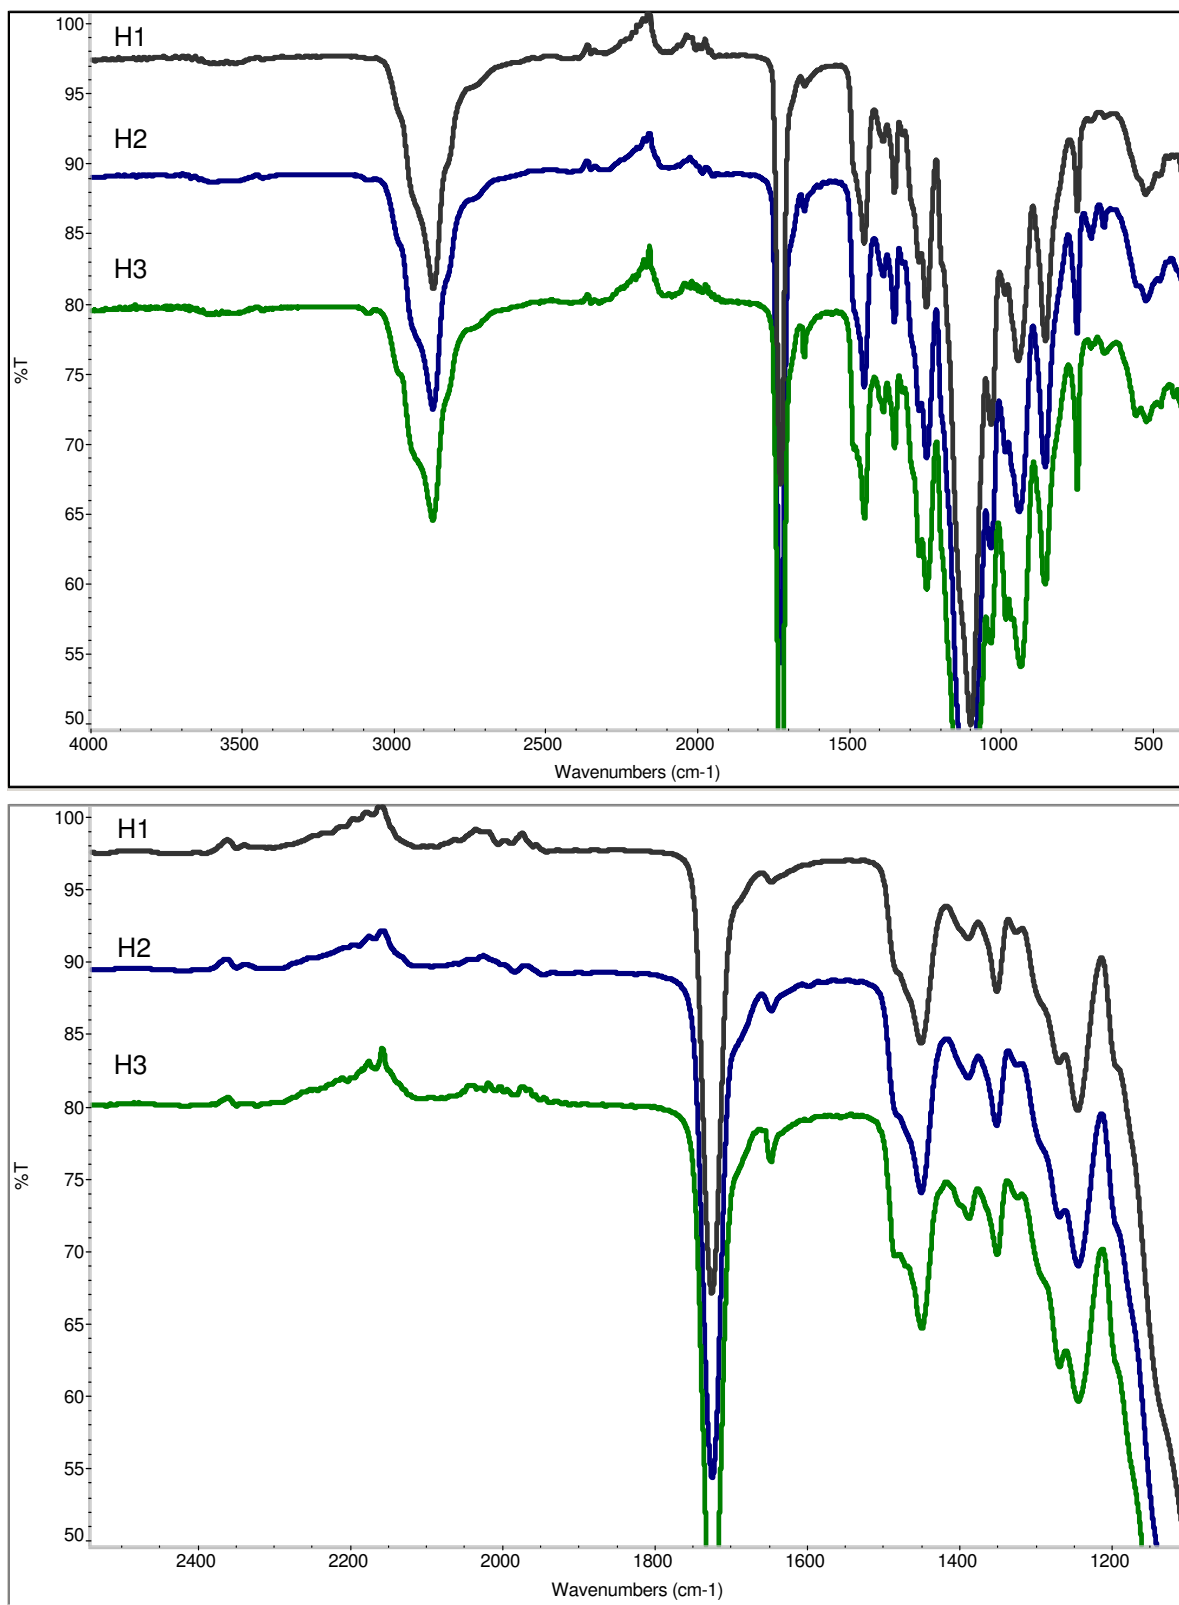

Figure S1. FT-IR spectra of hydrogels H1, H2 and H3

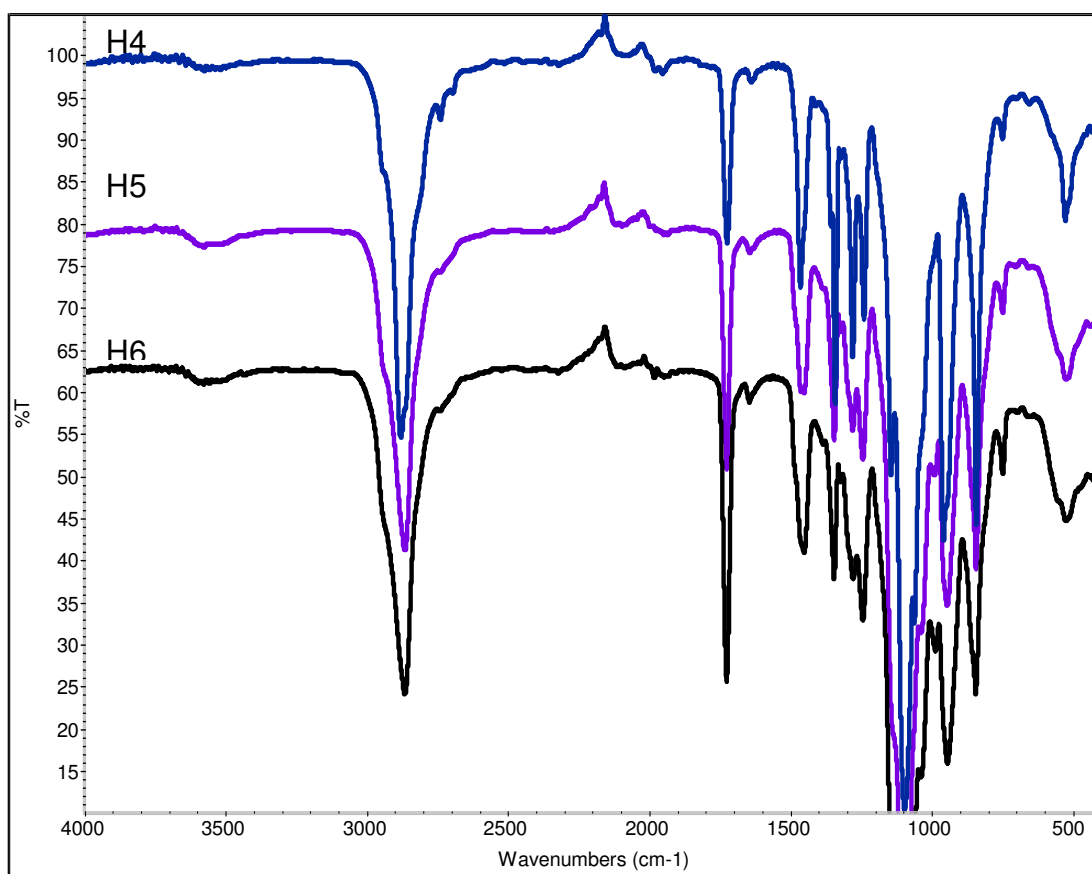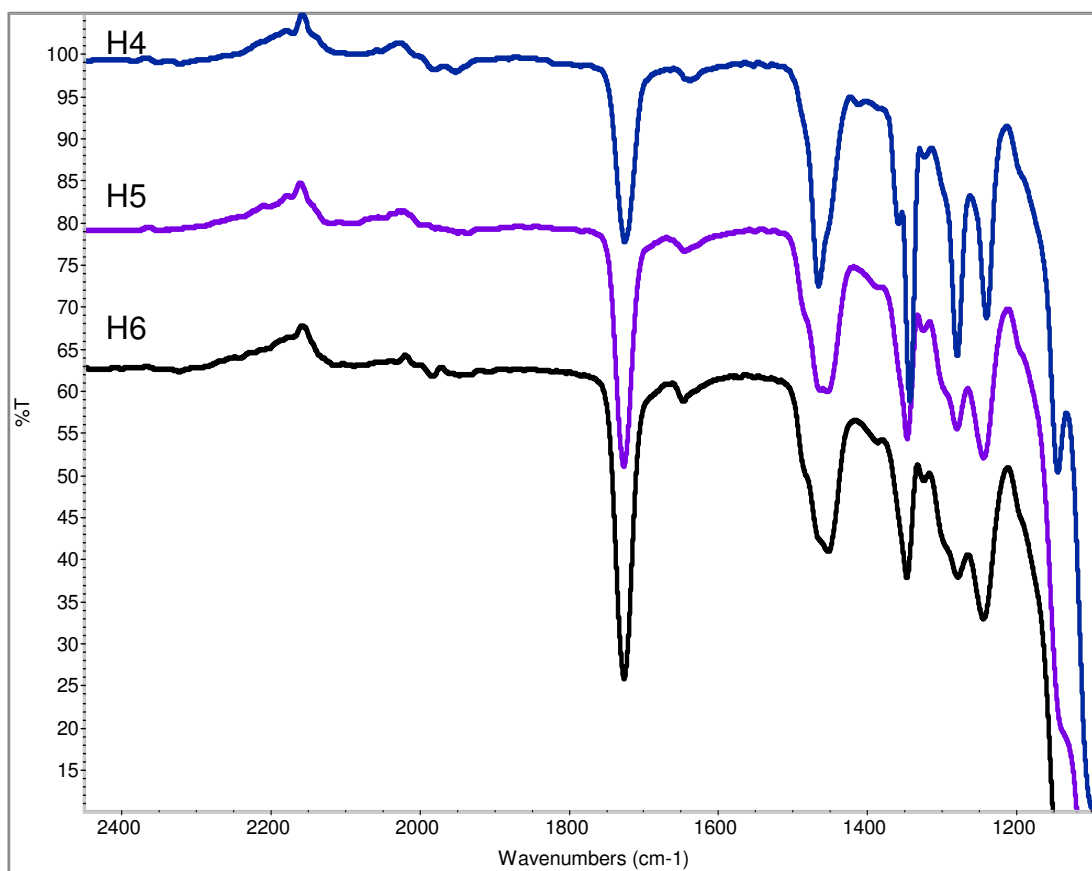

.Figure S2. FT-IR spectra of hydrogels H4, H5 and H6.

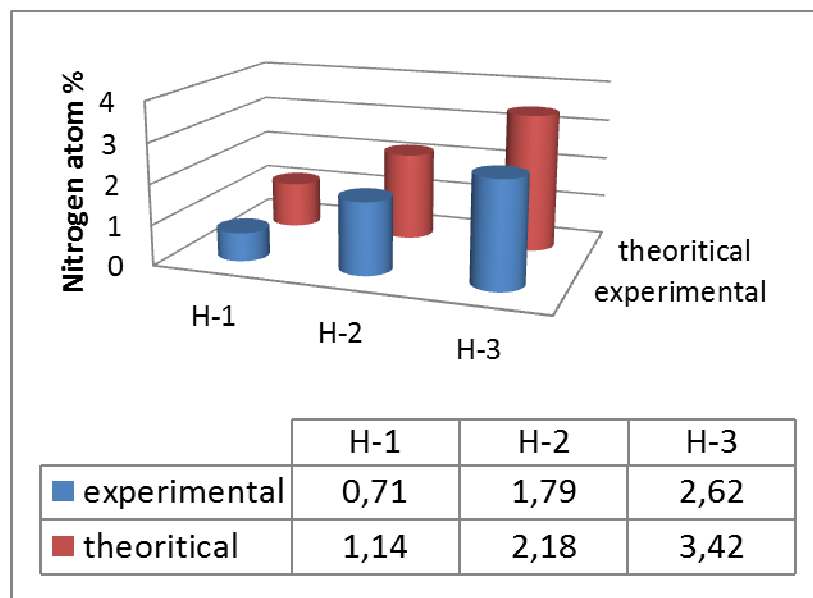

Figure S3. Theoretical and experimental N atom percentage of Cysteamine.HCl attached hydrogels
